# Supplementary figures and images for: Robustness of the microtubule network self-organization in epithelia
Source: eLife journal article supplement (doi:10.7554/elife.59529), 2021-02-01

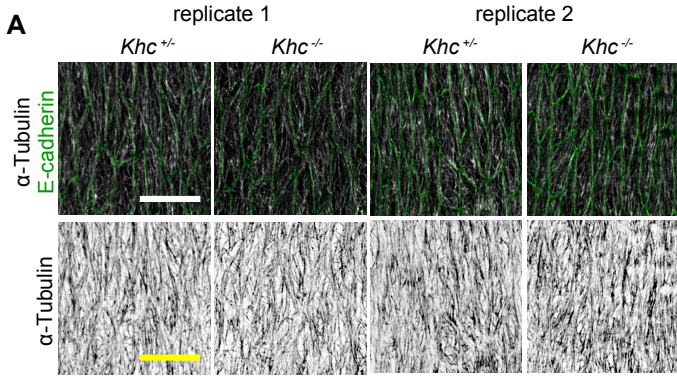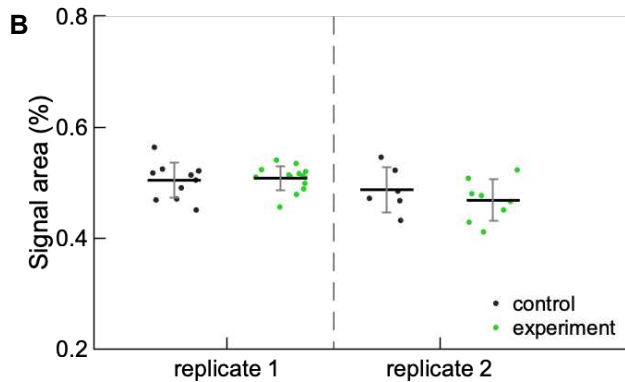

Supplement: supp [file elife_poa_e59529_Appendix_1_figure_1.pdf › elife_poa_e59529_Appendix_1_figure_1.pdf]

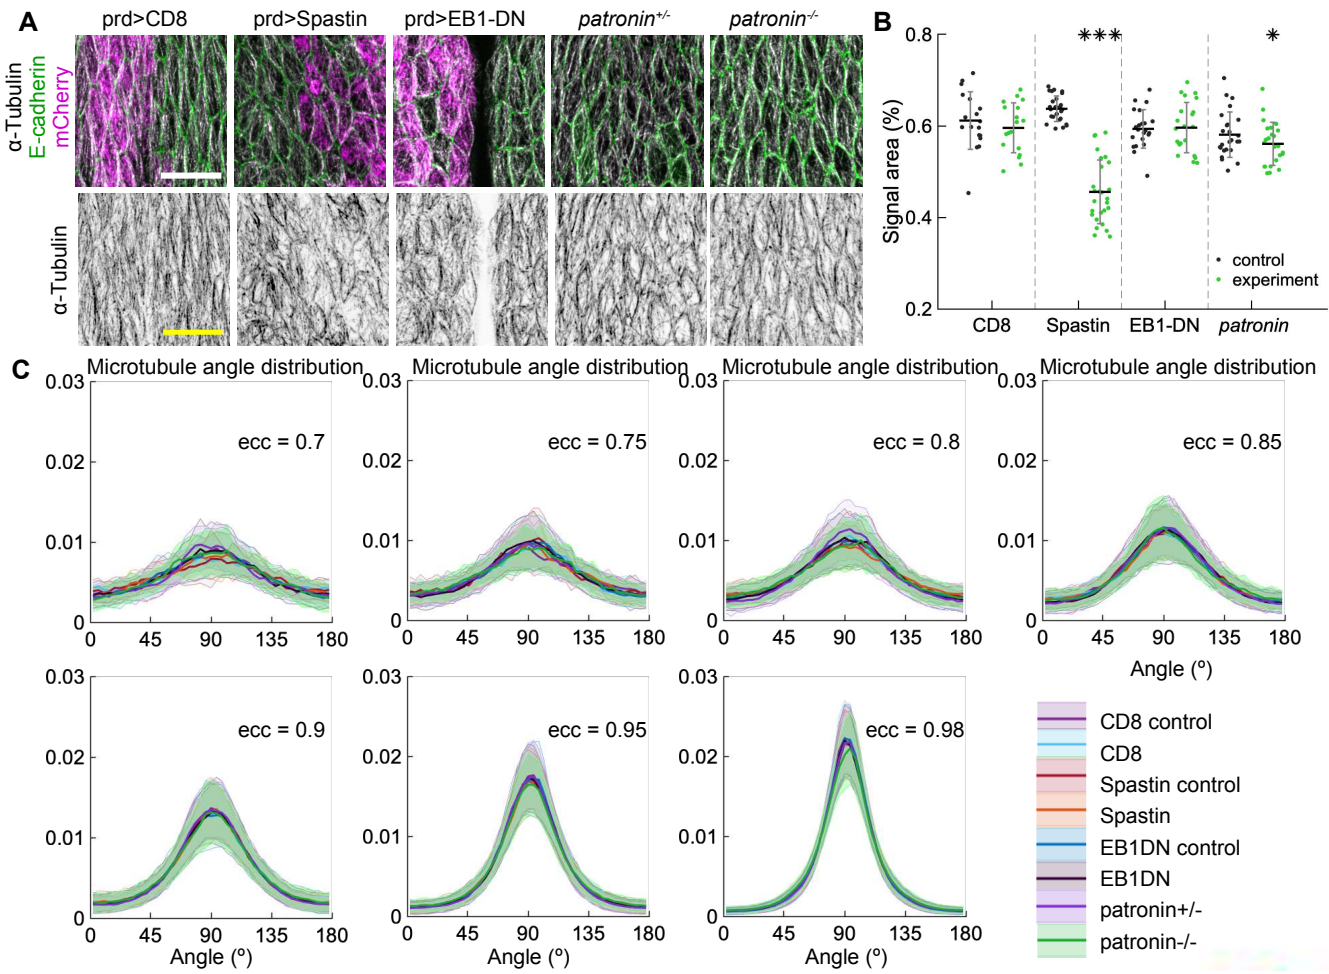

Supplement: supp [file elife_poa_e59529_Appendix_1_figure_2.pdf › elife_poa_e59529_Appendix_1_figure_2.pdf]
